# Supplementary material
Source: PubMed Central journal article supplement (PMC10118288)

**A**

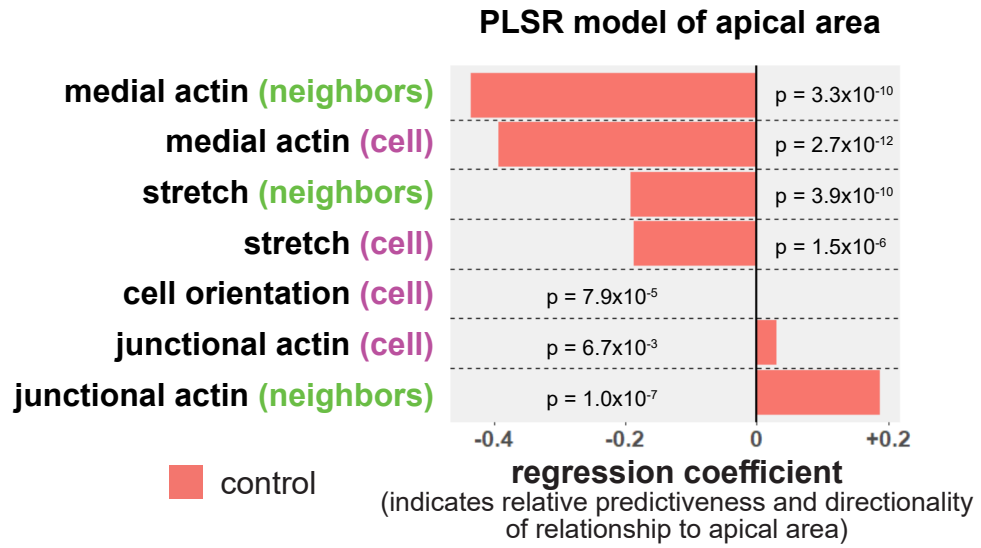

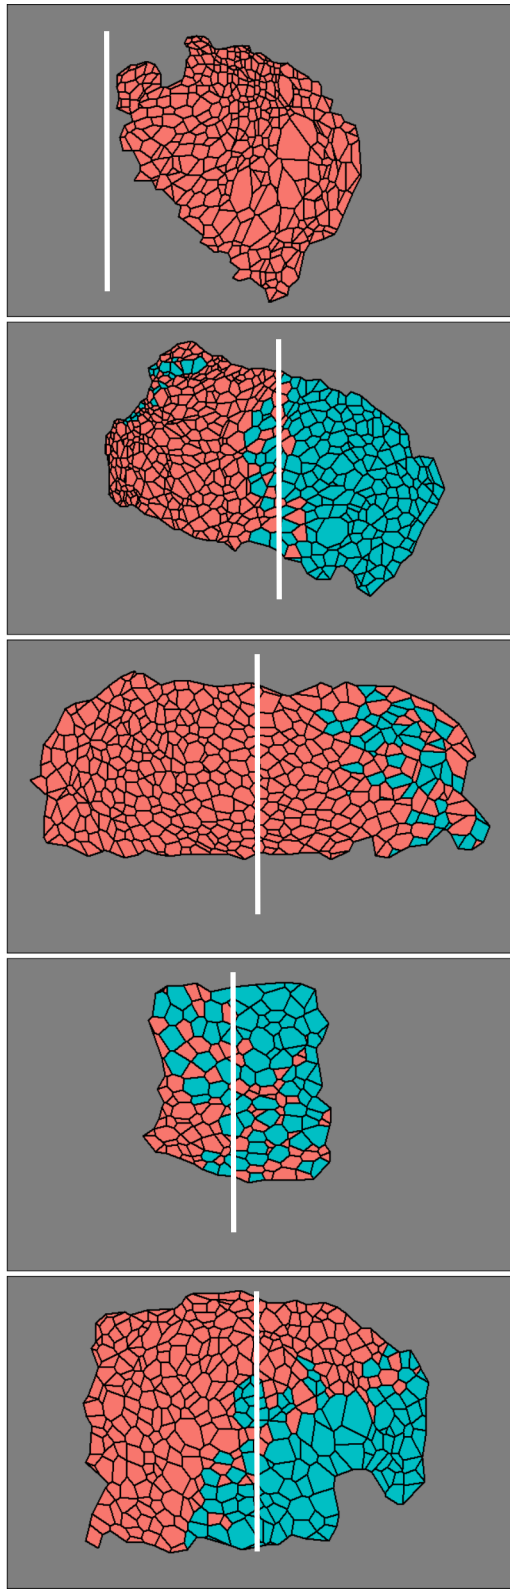

control    *shroom3* crispant

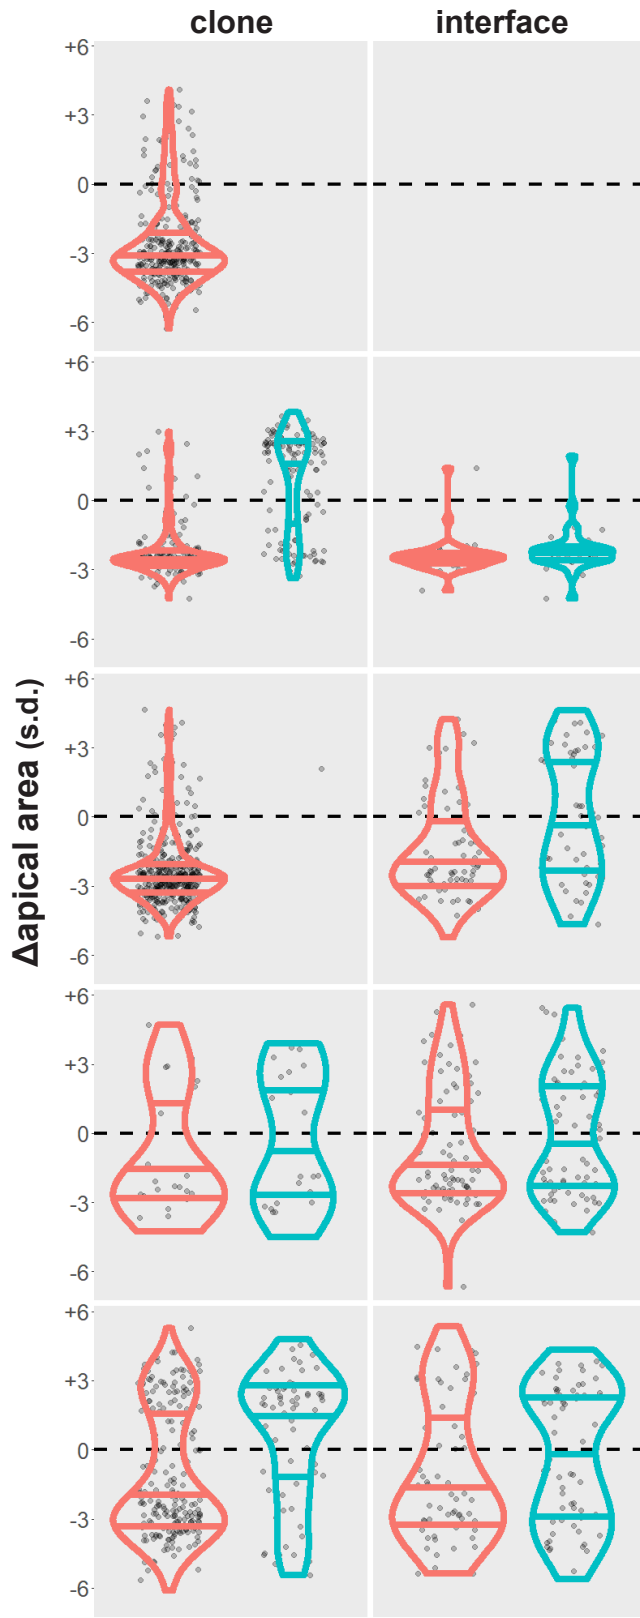

control    *shroom3* crispant

Baldwin et al. Figure S2

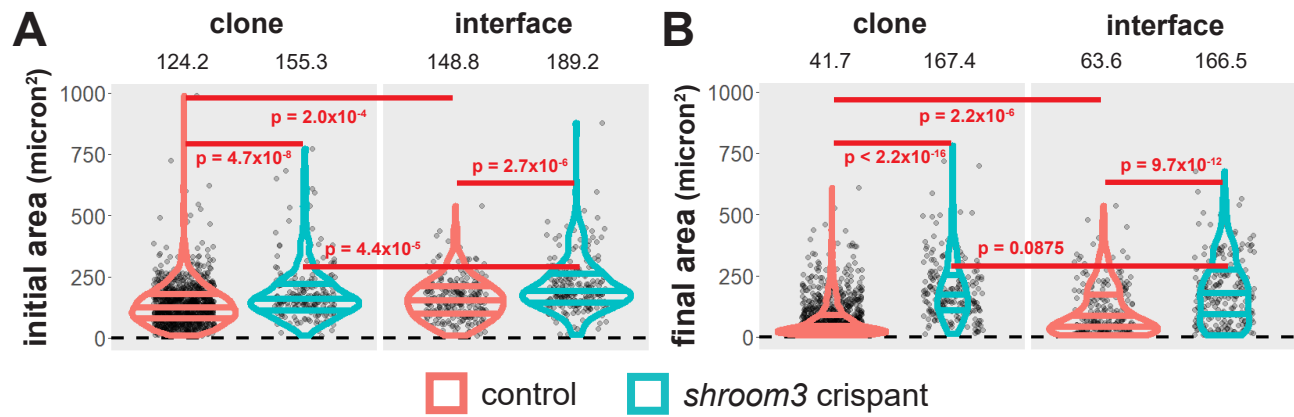

Baldwin et al. Figure S3

Supplement: NIHMS1886599-supplement-1.pdf [file NIHMS1886599-supplement-1.pdf]
